# Supplementary material for: Systematic and quantitative view of the antiviral arsenal of prokaryotes
Source: bioRxiv or medRxiv preprint supplement (doi:10.1101/2021.09.02.458658), 2021-09-03

# Supplementary material

## Supplementary Table 1

List of systems, rules and HMM profiles used in DefenseFinder

## Supplementary Table 2

Anti-phage systems detected.

## Supplementary Table 3

Genes involved in anti-phage systems

## Supplementary Table 4

Anti-phage systems per genome

## Supplementary Table 5

Detection of prophages

# Supplementary Figures

## Supplementary figure 1: Validation of DefenseFinder models

**a.** Phylogenetic tree of SduA. Dark blue was found by an initial round of the DefenseFinder models, light blue was missed (compared to detection from Doron et al) **b.** Table of sensitivity and sensibility for systems from Doron et al. **c.** Validation of the detection of RM **d.** Comparison of distribution of retron subtypes.

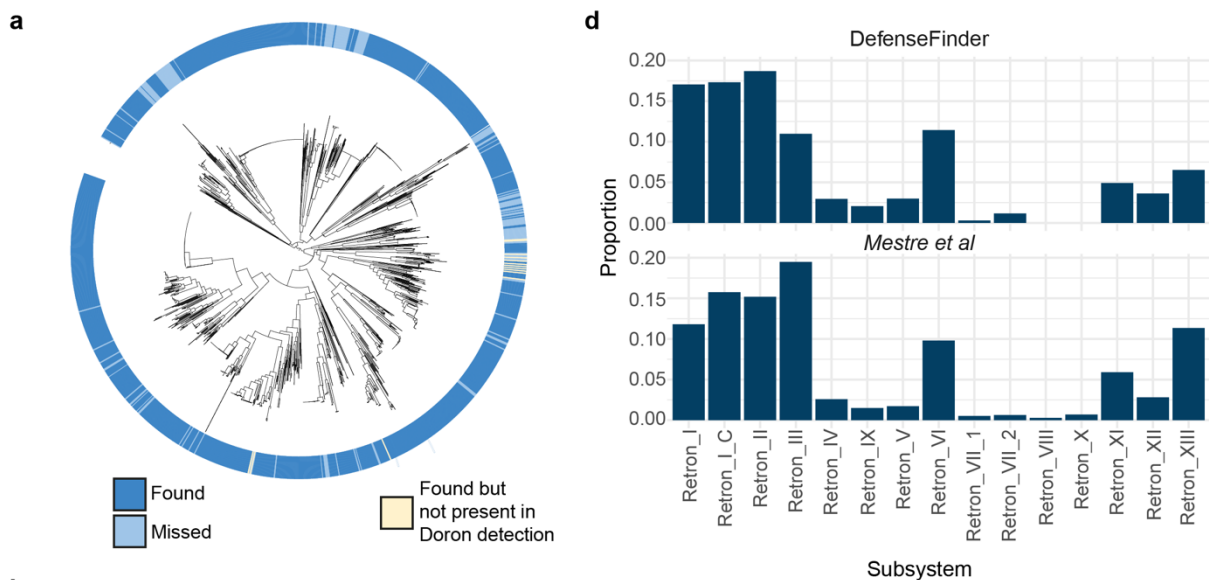

## Supplementary figure 2: Families of anti-phage systems are correlated with the total number of anti-phage systems

**a.** Distribution of the number of families anti-phage systems per genome. The x-axis was cut at 20 for data visualization purposes. **b.** Correlation between the families of anti-phage systems and the total number of anti-phage systems ( Spearman  $\rho=0.79$  P-value $<0.0001$ ).

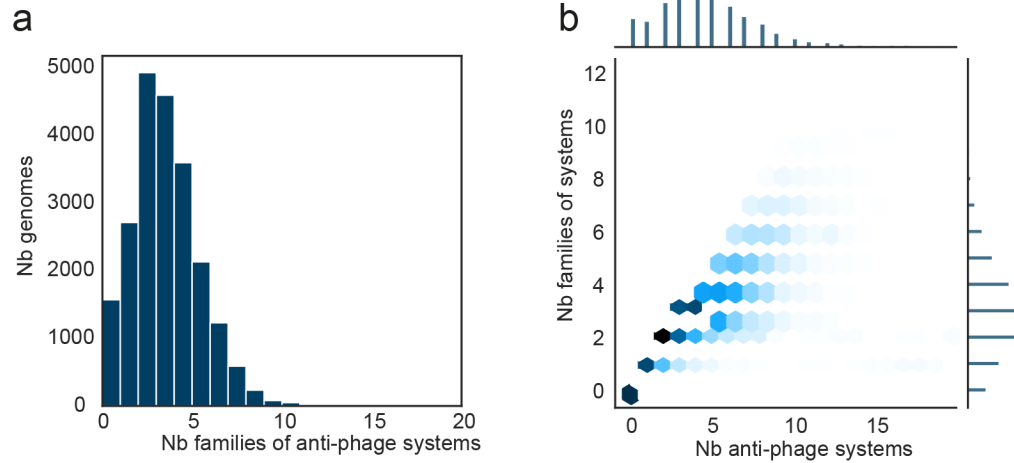

## Supplementary figure 3: Prophage detection

**a.** Distribution of the number of prophages per genome. **b.** Correlation between number of prophages and genome size.

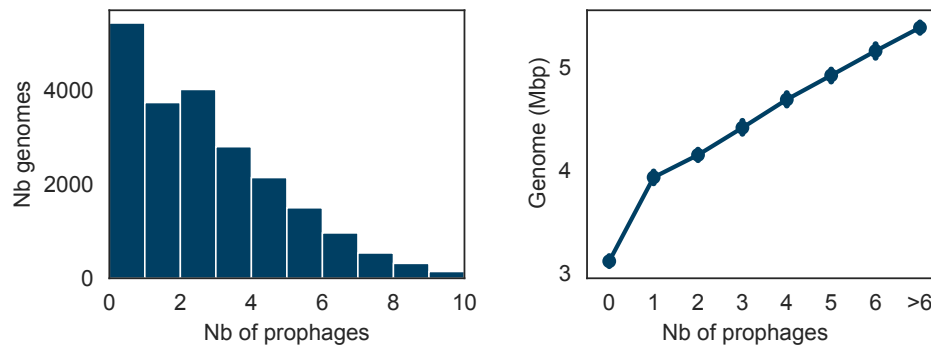



## Supplementary figure 5: Anti-viral arsenal of diverse bacterial species

Each panel shows the distribution of the total number of systems in the species (top panel), the frequency of the 20 most common anti-phage systems in prokaryotes in this species (bottom panel) and a phylogenetic tree of the species with the presence/absence of the 10 most common anti-phage systems in prokaryotes.

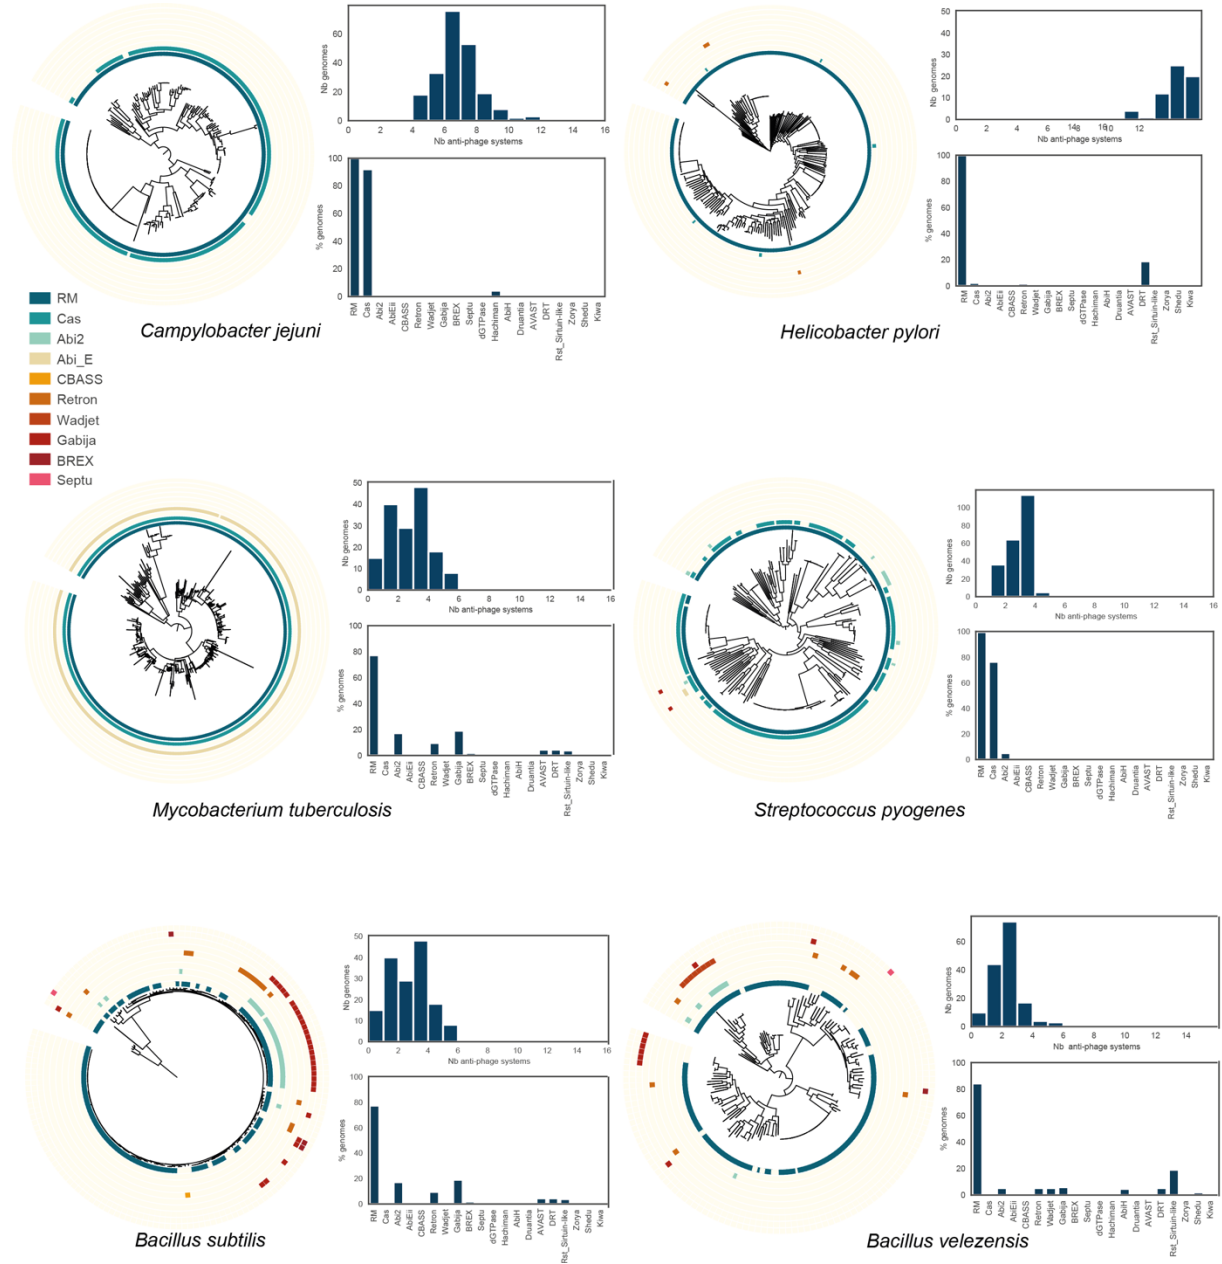

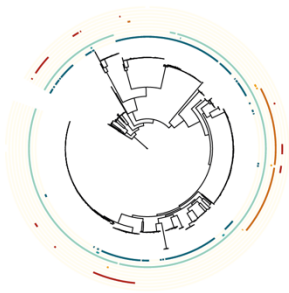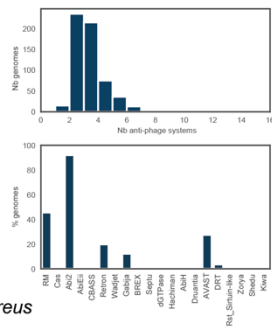

*Staphylococcus aureus*

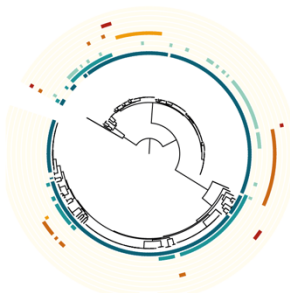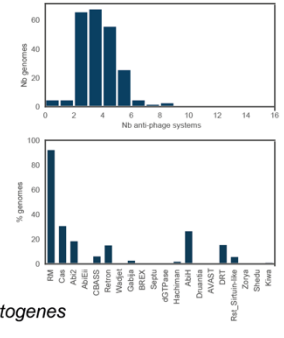

*Listeria monocytogenes*

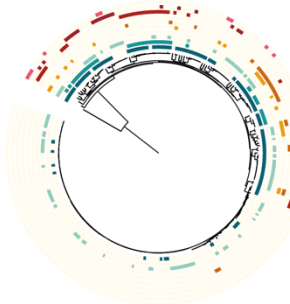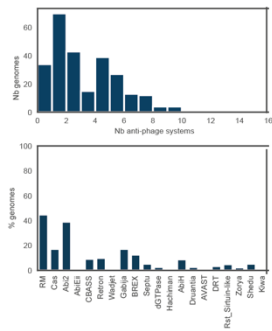

*Acinetobacter baumannii*

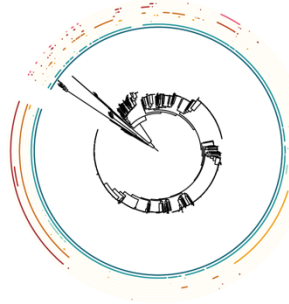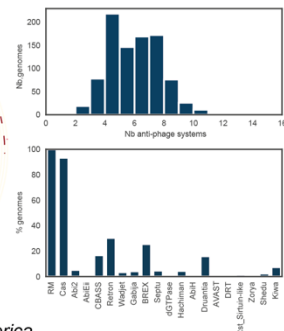

*Salmonella enterica*

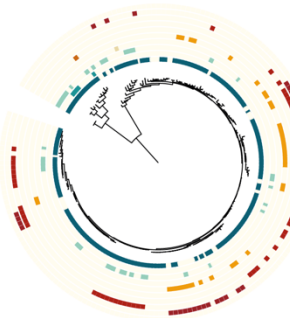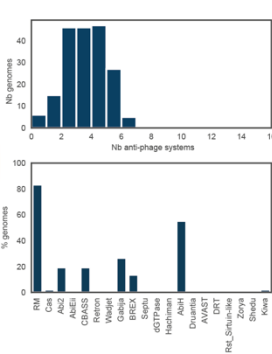

*Enterococcus faecium*

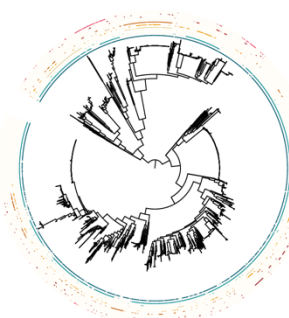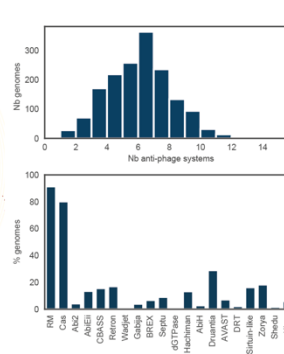

*Escherichia coli*

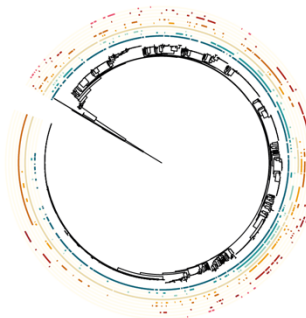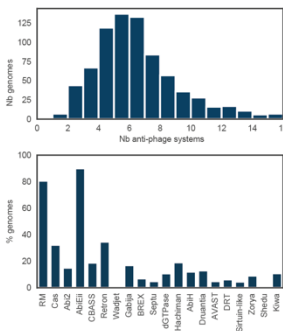

*Klebsiella pneumoniae*

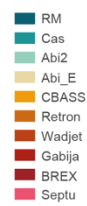

## Supplementary Figure 6: Anti-viral arsenal of bacterial species are diverse

**a.** Scatter plot for the anti-viral arsenal of prokaryotes. **b.** Correlation between the phylogenetic distance and the Bray-Curtis distance of the anti-viral arsenal of diverse species. Each plot corresponds to one species. For each species, the Bray-Curtis distance (dist\_BC) of all pairs of anti-viral arsenals was computed as well as the phylogenetic distance (dist\_phylo) between all strains. Each line corresponds to a pearson fit of the data.

**a**

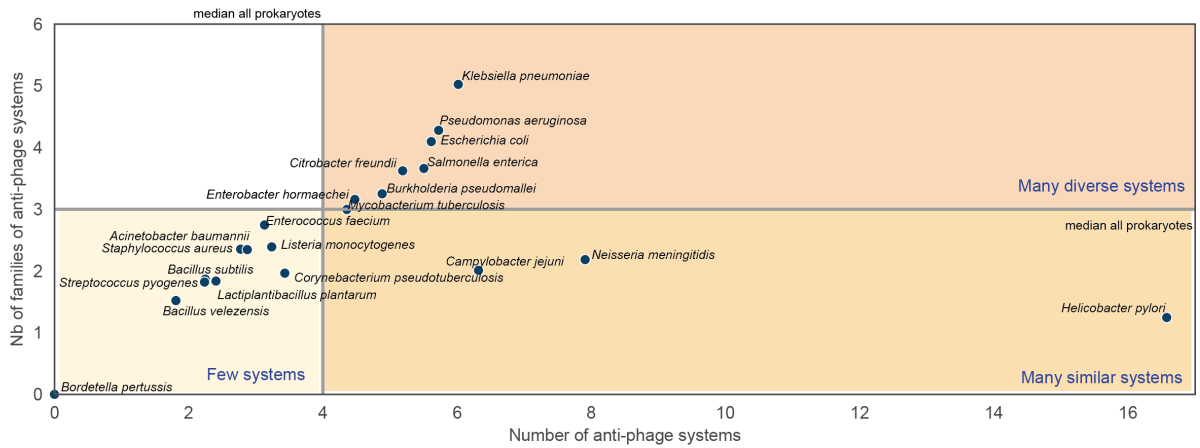

**b**

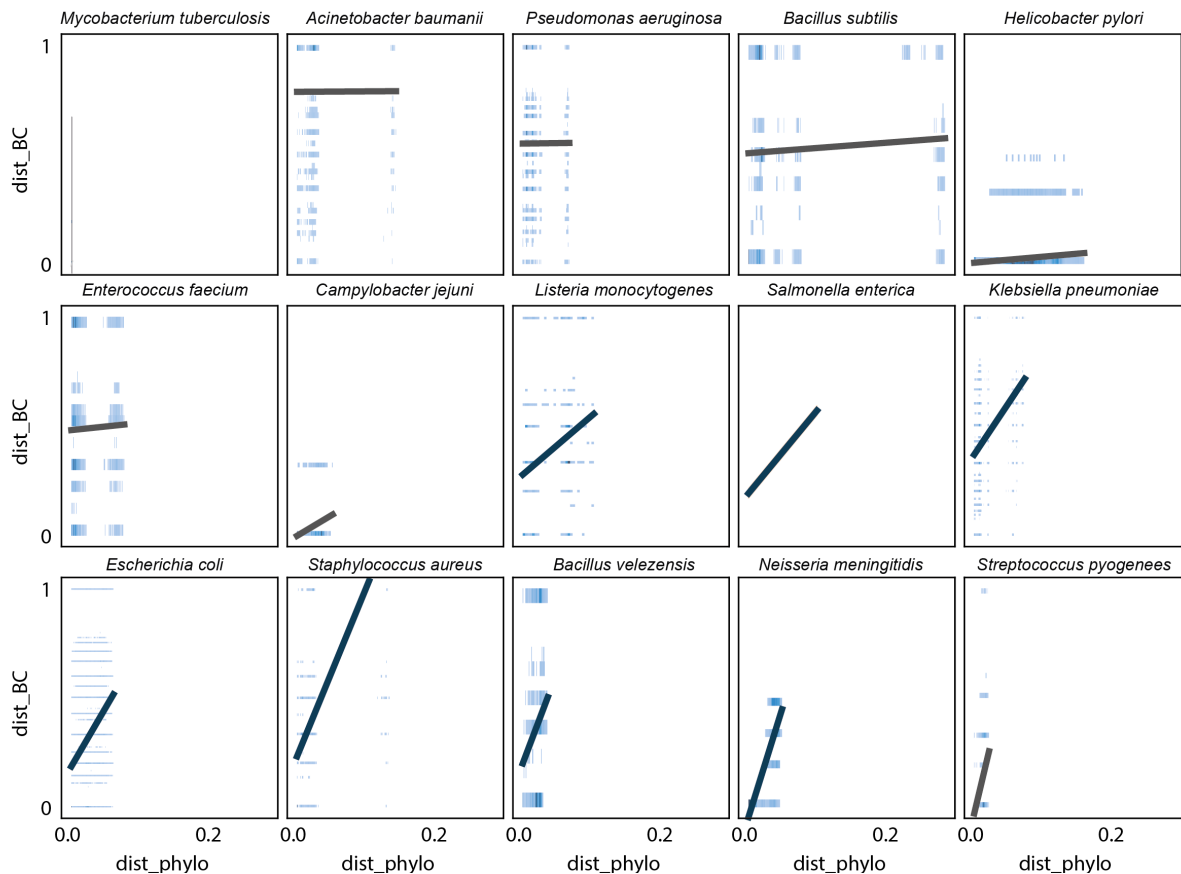

## Supplementary figure 7: Determinants of the anti-viral arsenal of bacterial species

**a.** Genome size of bacterial species. **b.** Correlation between the families of anti-phage systems and the genome size (Linear regression pearson  $r=0.65$ ,  $p$ -value=0.0014). **c.** Correlation between the number of anti-phage systems and the number of prophages (linear regression  $r=-0.2$   $p$ -value=0.4). **d.** Correlation between the number of anti-phage systems and the genome size (linear regression  $r=-0.16$   $p$ -value=0.5).

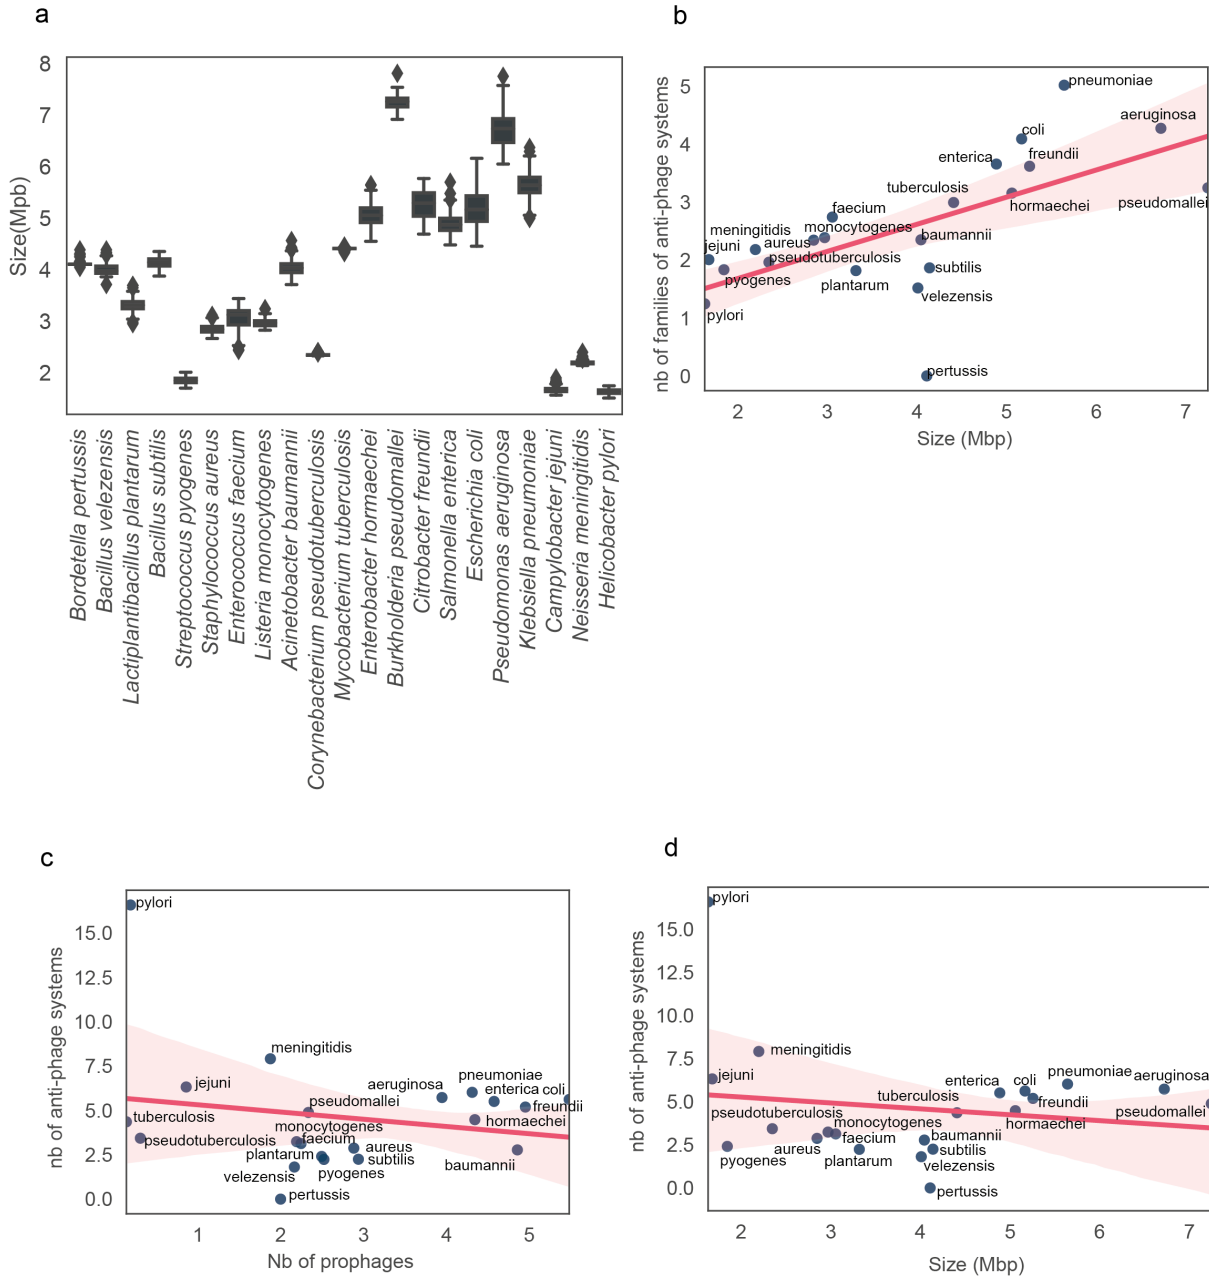

Supplement: Supplementary file [file media-6.pdf]
